# Supplementary material
Source: PubMed Central journal article supplement (PMC30115)

23 tongue  
 10 heart  
 xx skeletal muscle  
 47 NI D skin  
 48 NI D skin  
 09 spleen  
 13 liver  
 xx NI head  
 xx NI head  
 xx NI head  
 44 E14 liver  
 58 Fyhus  
 25 E14 liver  
 27 E14 liver  
 64 olfactory brain  
 62 E14 head  
 26 E10 whole body  
 31 E15 head  
 75 eyeball  
 77 cortex  
 78 cerebellum  
 07 brain  
 xx NI lung  
 51 NI D intestine  
 52 NI D intestine  
 xx liver tumor  
 12 lung  
 40 E14 head  
 41 E14 head  
 41 E14 head  
 06 kidney  
 79 vesicular gland  
 xx head  
 xx head  
 83 uterus  
 39 E19 whole body  
 xx NI D head  
 20 small intestine  
 18 pancreas  
 22 stomach  
 30 colon  
 50 colon  
 88 bone  
 43 Fyhus (preg 1)  
 88 testis  
 45 major gland (lec 10)  
 16 placenta

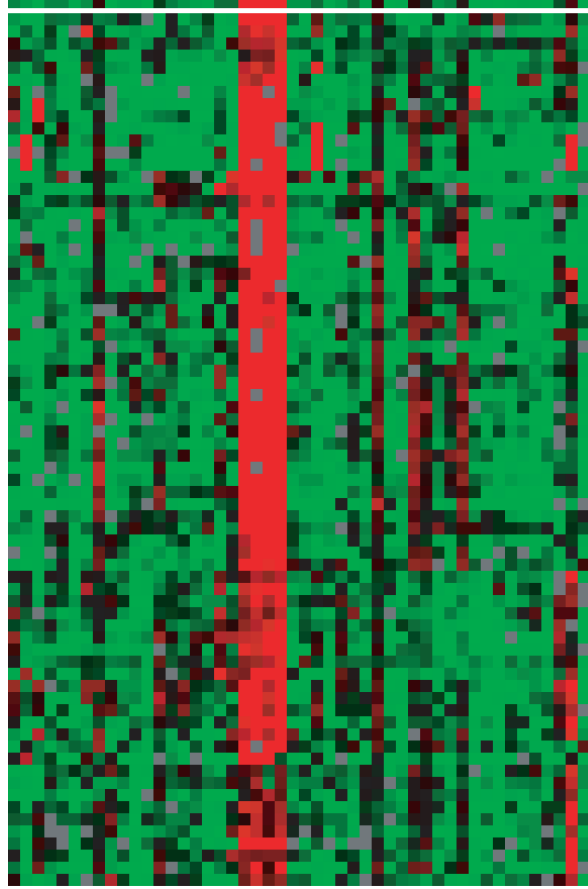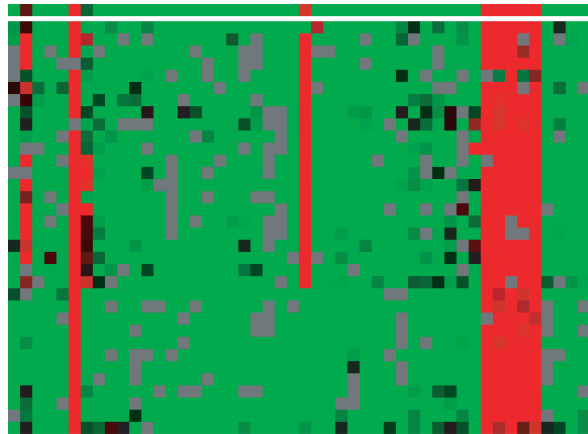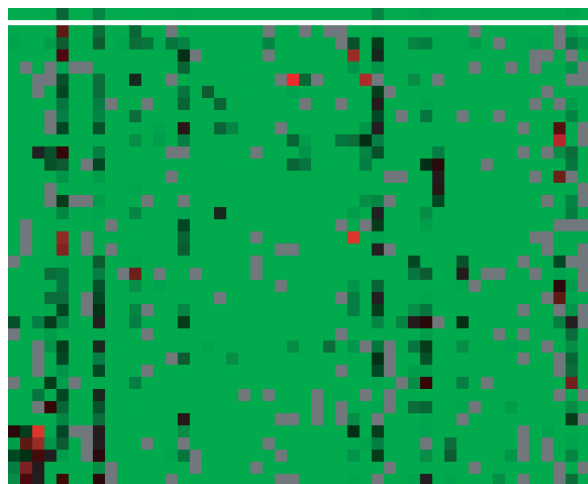

Supplement: pnas_98_5_2199__2.pdf [file pnas_98_5_2199__2.pdf]
