# Supplementary material
Source: PubMed Central journal article supplement (PMC30115)
Supplement: pnas_98_5_2199__4.pdf [file pnas_98_5_2199__4.pdf]

62 E11 head  
30 E12 head  
31 E13 head  
40 E15 head  
41 E16 head  
33 E17 head  
xx N0 head  
xx N6 head  
xx N10 head  
65 N10 cerebellum  
15 cerebellum  
07 brain  
77 cortex  
75 eyeball  
63 medulla oblongata  
64 olfactory brain

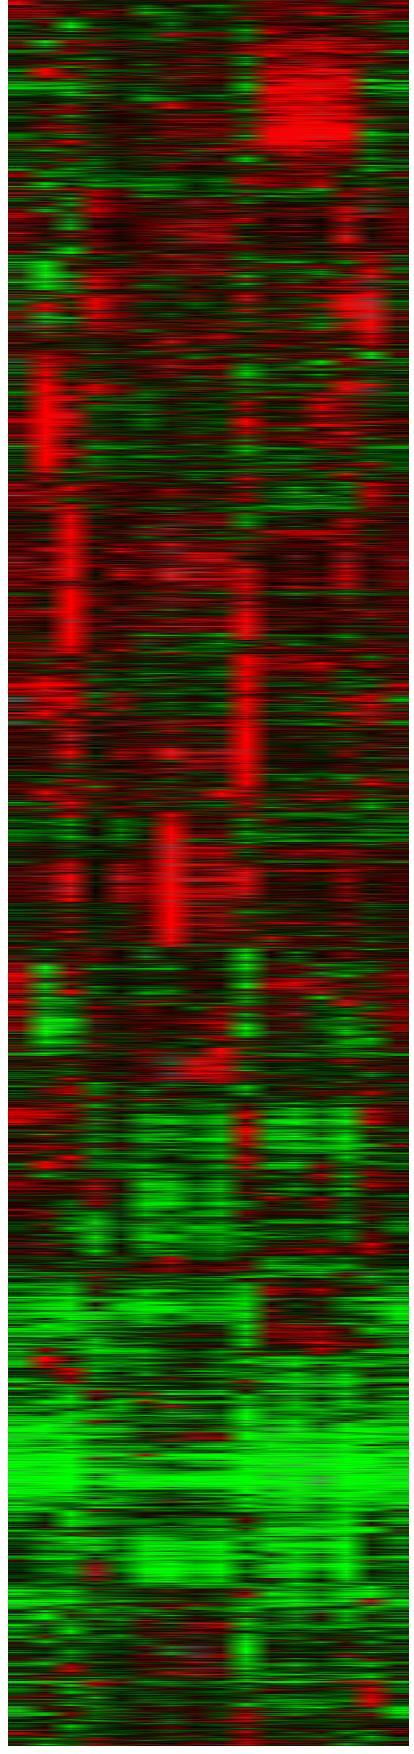

Adult brain

E12 head

E13 head

N10 cerebellum

N0 head
