# Supplementary material
Source: PubMed Central journal article supplement (PMC30115)
Supplement: pnas_98_5_2199__6.pdf [file pnas_98_5_2199__6.pdf]

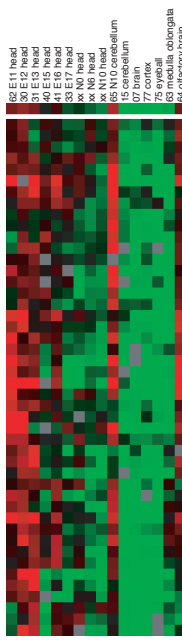

1190025H01 ESTs, similar to hypothetical TRP-ASP repeats containing protein in CP94-SOL2 intergenic region  
 1190033J08 ESTs  
 2810401C18 U22 snoRNA host gene (UHG) gene  
 2410003H1 ESTs, similar to CGI-122 protein [H.sapiens]  
 1500034B23 cyclin D1 [FANTOM]  
 1110038H03 unclassifiable transcript [FANTOM]  
 1110046A09 ESTs  
 311000123 CBFA2T1 identified gene homolog (human)  
 2010030I04 homolog to Tax1 (human T-cell leukemia virus type 1) binding protein 1 [FANTOM]  
 2810002E05 homolog to cyclophilin [FANTOM] [by way of 1100001J08]  
 2310022C11 ESTs, similar to HYPOTHETICAL PROTEIN KIAA0176 [H.sapiens]  
 2310039M01 nestin [FANTOM]  
 1190009N02 EST, similar to (define not available 6164869) [M.musculus]  
 2810401B17 cyclin D1  
 2610036B18 Y box protein 3 [FANTOM]  
 2610034J22 ESTs  
 2210404G23 homolog to TBP-INTERACTING PROTEIN TIP120B SHORT FORM. [FANTOM]  
 2810001M16 TEA domain family member 2  
 1500035P15 ESTs  
 2600002A22 nestin [FANTOM] [by way of 1190008F12]  
 3000002B11 unclassifiable transcript [FANTOM] [by way of 2610012D22]  
 2700084B12 midkine  
 2610017A03 unclassifiable transcript [FANTOM]  
 2810404C01 midkine  
 2810002M14 cysteine-rich protein 2 [FANTOM]  
 1110062E02 cyclin D1  
 1110067J03 ESTs  
 2400001H09 cysteine-rich protein 2  
 2610039K01 unclassifiable transcript [FANTOM]  
 1190012A07 homolog to calcium-regulated heat stable protein CRHSP-24 [FANTOM] [by way of 1200011K09]  
 0610037K01 hypothetical protein [FANTOM]  
 1110064A08 neural precursor cell expressed, developmentally down-regulated gene 4  
 2310066B15 hematological and neurological expressed sequence 1 [FANTOM]  
 2210403H11 unclassifiable transcript [FANTOM] [by way of 2810403B18]  
 1700028D05 homolog to NASOPHARYNGEAL EPITHELIUM SPECIFIC PROTEIN 1. [FANTOM]  
 1100006O11 ESTs  
 2900002P19 mammary tumor integration site 6 [FANTOM] [by way of 0610012A16]  
 1110030C24 guanine nucleotide binding protein, alpha 11  
 2700065E21 ribosomal protein S15 [FANTOM]  
 2410030B04 homolog to human 60S ACIDIC RIBOSOMAL PROTEIN P2. [FANTOM]  
 2310001G11 CD24 antigen  
 1110002O06 cysteine-rich protein 2 [FANTOM]  
 2310039N12 prolyl 4-hydroxylase, beta polypeptide  
 2310074C03 related to SKIN-SPECIFIC PROTEIN [FANTOM] [by way of 2300007B01]  
 2310409F01 serine palmitoyltransferase, long chain base subunit 2 [FANTOM]  
 2010001E04 unclassifiable [FANTOM]

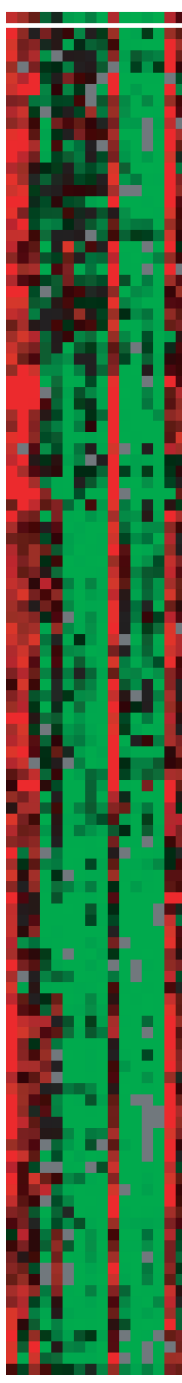

2610529E15 Tera (Tera) mRNA  
 2610529P06 EST  
 2810406G03 homolog to HYPOTHETICAL PROTEIN KIAA0101.[fantom]  
 1110002E03 unclassifiable transcript [fantom]  
 2510004L17 ESTs  
 1200001C16 GLN retrotransposon family 3-1  
 1600019P09 U2-enRNP b' (pRNP11)  
 1500006J04 DNA primase, p49 subunit  
 270007824 ESTs  
 1700008B16 karyopherin (importin) alpha 2  
 2610005E21 homolog to FL533.[fantom]  
 1700026B03 RAS-like, family 2, locus 9[fantom]  
 1110036C23 DNA methyltransferase (cytosine-5)  
 1190024M07 mini chromosome maintenance deficient 4[fantom]  
 1700028H20 serine/threonine kinase 18[fantom]  
 1110061N19 nuclear protein 95[fantom]  
 1700010N24 ESTs, similar to ACTIVATOR 1 37 KD SUBUNIT [Homo sapiens]  
 1700029M11 ADP-ribosyltransferase (NAD+, poly (ADP-ribose) polymerase) 1  
 1700029M02 actin-like 6[fantom]  
 2610024A10 MAD2 (mitotic arrest deficient, homolog)[fantom]  
 3110001D19 homolog to MITOTIC KINASE-LIKE PROTEIN-1.[fantom]  
 2010204C16 high mobility group protein 2[fantom]  
 2610009D01 ESTs, similar to unknown [C.elegans]  
 2400001O07 EST  
 1810016H06 ADP-ribosyltransferase (NAD+, poly (ADP-ribose) polymerase) 1  
 1700001K22 similar to REPLICATION FACTOR C, 40 KDA SUBUNIT.[fantom]  
 1110007D06 ring finger protein 2[fantom]  
 1700029D20 small E2F-rich factor 1[fantom]  
 2700088C10 hyaluronidase 2  
 1810011H18 homolog to U5 SNRNP-SPECIFIC 40 KDA PROTEIN.[fantom]  
 2510001I21 proliferation-associated protein 1  
 2410002C03 ADP-ribosylarginine hydrolase  
 2410004F21 cyclin B1, related sequence 1  
 2310052K12 mini chromosome maintenance deficient 7 (S. cerevisiae)  
 2510004H09 poly A binding protein, cytoplasmic 1  
 2410004M23 amelogenin  
 2400002C05 nucleophosmin 1  
 1810018E15 DEK oncogene (DNA binding)[fantom]  
 2810421N01 LIPOATE-PROTEIN LIGASE B (LIPOATE BIOSYNTHESIS PROTEIN B)  
 1810026F04 homolog to HSPC025.[fantom]  
 2510002A03 transcriptional intermediary factor 1, beta  
 2810002B04 hemoglobin X, alpha-like embryonic chain in Hba complex  
 2700038P03 tubulin, beta 5[fantom]  
 221042E09 high mobility group protein 1  
 2810402H01 splicing factor, arginine/serine-rich 3 (SRp20)  
 1700016F14 MDJ6.[fantom]  
 2610034C21 splicing factor, arginine/serine-rich 3[fantom]  
 2310048F15 ESTs, similar to heterogenous nuclear ribonucleoprotein A2/B1 [M.musculus]  
 2410006F02 syntrophin, acidic 1  
 2810017D11 splicing factor, arginine/serine-rich 3[fantom]  
 2610027C05 ESTs, similar to PRE-MRNA SPLICING FACTOR SRP75 [Homo sapiens]  
 2610025E13 ESTs  
 3300002D11 Ewing sarcoma homolog[fantom]  
 2600017F24 ESTs  
 1700011N22 high mobility group protein 1  
 1500005O20 ESTs  
 1600012G22 splicing factor, arginine/serine-rich 3 (SRp20)  
 1500015E08 ESTs  
 0610016P10 ESTs, similar to nucleoporin Nup84 [R.norvegicus]  
 1700008B17 Mus musculus 26S proteasome ATPase (C1P21) mRNA, complete cds  
 1500005D11 hexosaminidase  
 1700028K07 RAN, member RAS oncogene family[fantom]  
 1500032N16 glycosyl-phosphatidylinositol-anchored protein homolog  
 1500034K21 NUCLEOSOME ASSEMBLY PROTEIN 1-LIKE 1  
 2810003H07 UDP-glucuronosyltransferase 1 family, me[fantom]  
 2810003O07 RNA binding motif protein, X chromosome retrogene  
 2600001I05 nucleolin  
 2400002A21 prothymosin alpha  
 2500002K24 similar to PROLIFERATING CELL NUCLEAR ANTIGEN (PCNA) (CYCLIN).[fantom]  
 1110001C01 ESTs, similar to putative deubiquitinating enzyme UBPY [M.musculus]  
 2610524I02 ESTs  
 2810403C15 splicing factor, arginine/serine-rich 3 (SRp20)  
 1190033D17 cytokine inducible SH2-containing protein 7  
 2610048F12 inosine 5'-phosphate dehydrogenase 2[fantom]  
 2410003J23 ribosomal protein S3  
 2010016F17 RNA binding protein 1  
 2810417B20 similar to BAF57[fantom]  
 2700082L14 EST  
 2410005G18 hypothetical protein[fantom]  
 2410005A12 C8[fantom]  
 2700047H10 high mobility group protein 17[fantom]  
 2510042E23 EST  
 2410006I22 solute carrier family 10 (sodium/bile acid cotransporter family), member 1  
 2810004G22 homolog to UBIQUITIN-CONJUGATING ENZYME E2 H10 (EC 6.3.2.19) (UBIQUITIN-CARRIER PROTEIN).[fantom]  
 1110014E11 centromere autoantigen A  
 2600017H22 Rad51 homolog (S. cerevisiae)[fantom]  
 2700088A02 ESTs  
 2610017G21 thymidylate synthase[fantom]  
 2810406C15 related to 13S condensin XCAP-D2 subunit[fantom]  
 2610033C07 homolog to HYPOTHETICAL PROTEIN KIAA0101.[fantom]  
 2700018L05 unclassifiable transcript[fantom]  
 2410044B12 karyopherin (importin) alpha 2[fantom]  
 2610021G09 SM-20 (factor-responsive smooth muscle protein)[fantom]  
 3110002M17 EST, similar to UBIQUITIN-CONJUGATING ENZYME  
 0610017N24 ESTs  
 2610019J24 high mobility group protein 2[fantom]  
 2700055D09 high mobility group protein 2[fantom]  
 2610021J01 homolog to high-mobility group (nonhistone chromosomal) protein 1[fantom]  
 2610510C05 cyclin B1, related sequence 1[fantom]  
 2610042H15 mini chromosome maintenance deficient 4[fantom]  
 1700018M23 high mobility group protein 2  
 2010013J11 CYCLIN-DEPENDENT KINASES REGULATORY SUBUNIT 2[fantom]  
 3000002M17 Cyclin B1, related sequence 1  
 2010107E01 nuclear protein 95[fantom]  
 3110001H06 ESTs  
 2810403E20 high mobility group protein 1  
 1500011O13 ESTs, similar to (define not available 2668141) [H.sapiens]  
 2700078G08 major histocompatibility protein class II alpha  
 2610034C19 ribosomal protein S3[fantom]  
 2310046J12 homolog to RIBOSOMAL PROTEIN L41 (FRAGMENT).[fantom]  
 2700004E10 ring finger protein 2[fantom]  
 2510027A07 coproporphyrinogen oxidase  
 2610014N04 ESTs  
 1110037B17 ESTs  
 1700027H19 oxidative stress induced  
 1110056L21 proliferating cell nuclear antigen  
 250004E18 centromere autoantigen A  
 2510004J15 CD24a antigen  
 2810004I20 cyclin A2  
 2210404L05 ESTs

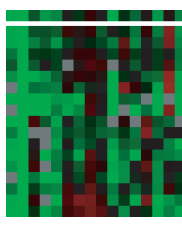

2310004K18 glucosamine-6-phosphate deaminase  
 1810049E24 EST  
 2310009M14 ESTs, similar to UBIQUITIN-CONJUGATING ENZYME E2-25 KD  
 2310004D13 ESTs, similar to similar to UNC-53  
 1810050B18 FXVD domain-containing ion transport reg[fantom]  
 1600012F10 EST  
 2510003C02 secreted acidic cysteine rich glycoprotein[fantom]  
 2310009B21 keratin complex 2, basic, gene 8  
 2210009N12 Mus musculus cellular repressor of E1A-stimulated genes CREG mRNA, complete cds  
 2310016H16 ESTs, similar to VESICULAR INTEGRAL-MEMBRANE PROTEIN VIP96 PRECURSOR  
 2410002B12 ESTs, similar to NADH-UBIQUINONE OXIDOREDUCTASE 23 KD SUBUNIT PRECURSOR  
 2310030H01 Nms mRNA  
 2310014M12 mitogen activated protein kinase kinase 3  
 2510002A14 homolog to KIAA0626[fantom]  
 2310020M13 homolog to 60S RIBOSOMAL PROTEIN L3-LIKE.[fantom]  
 2200002F14 palmitoyl-protein thioesterase  
 2210404H19 ESTs
