# Supplementary material
Source: PubMed Central journal article supplement (PMC30115)

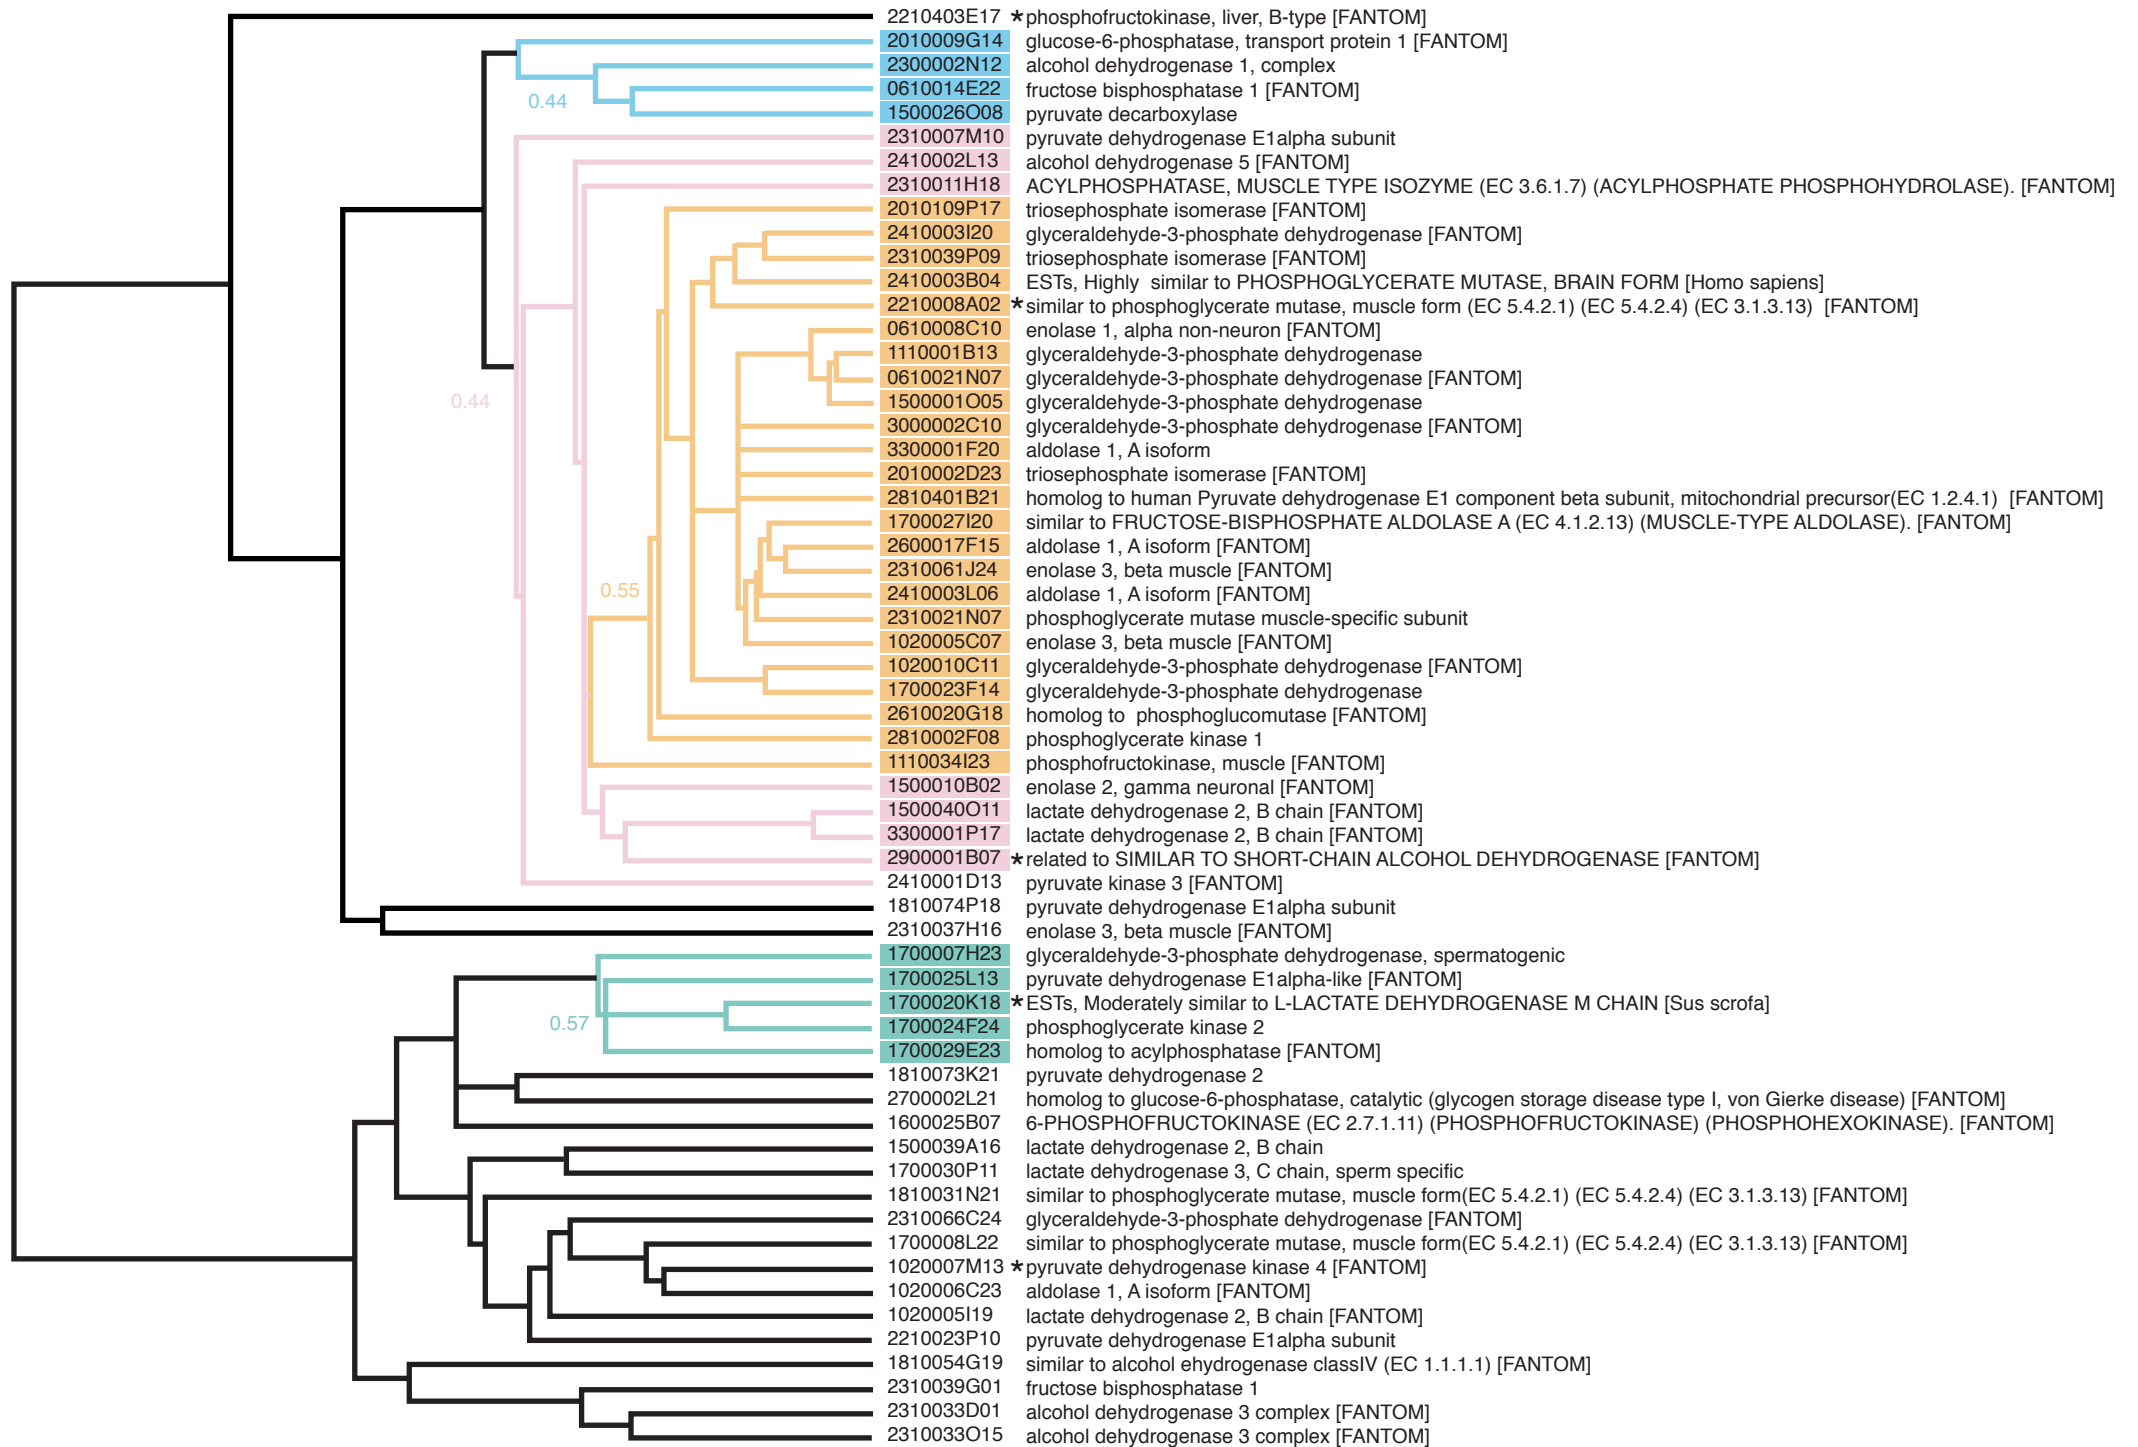

Supplement: pnas_98_5_2199__8.pdf [file pnas_98_5_2199__8.pdf]
